# Supplementary material for: Cardiac MRI in common marmosets revealing age-dependency of cardiac function
Source: PubMed Central journal article supplement (PMC7311402; doi:10.1038/s41598-020-67157-5), 2020-06-23
Supplement: 41598_2020_67157_MOESM1_ESM.pdf [file 41598_2020_67157_MOESM1_ESM.pdf]

## **Cardiac MRI in common marmosets reveals age-dependency of cardiac function**

**Amir Moussavi<sup>1,2\*</sup>, Matthias Mietsch<sup>2,3,4</sup>, Charis Drummer<sup>2,5</sup>, Rüdiger Behr<sup>2,5</sup>, Judith Mylius<sup>1</sup>, Susann Boretius<sup>1,2\*</sup>**

<sup>1</sup>Functional Imaging Laboratory, German Primate Center, Leibniz Institute for Primate Research, Göttingen, Germany

<sup>2</sup>DZHK (German Center for Cardiovascular Research), partner site Göttingen, Germany

<sup>3</sup>Unit of Infection Models, German Primate Center, Leibniz Institute for Primate Research, Göttingen, Germany

<sup>4</sup>Department of Laboratory Animal Science, German Primate Center, Leibniz Institute for Primate Research, Göttingen, Germany.

<sup>5</sup>Platform Degenerative Diseases, German Primate Center, Leibniz Institute for Primate Research, Göttingen, Germany

**Supplementary Figure 1: Wall thickening:** Both the absolute and fractional wall thickening correlate with the estimated LV-EF (Pearson's  $r = 0.76$  and  $0.75$  with  $p < 0.001$  for both).

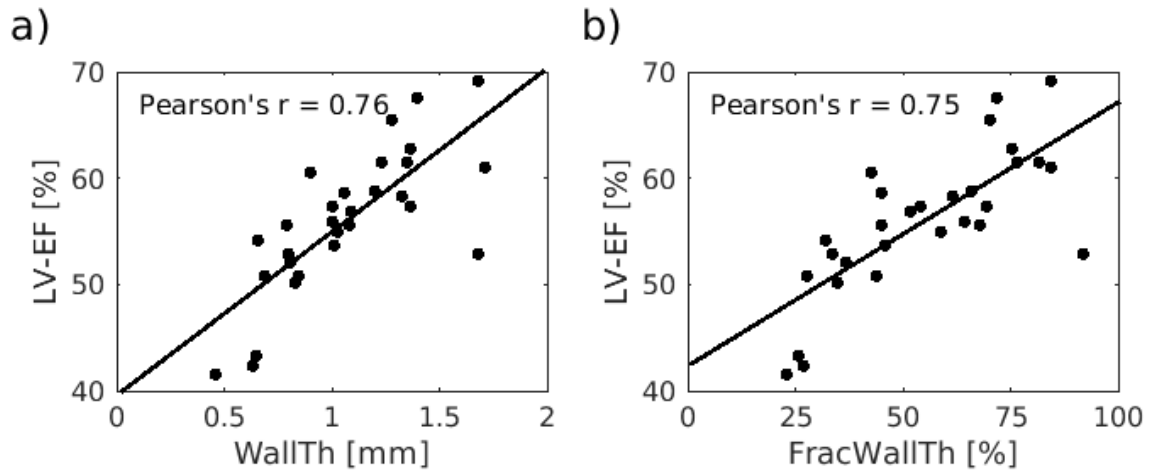

**Supplementary Figure 2: Myocardial segmentation.** A six sector segmentation model was used to calculate the left ventricular wall thickening of a mid-ventricular slice.

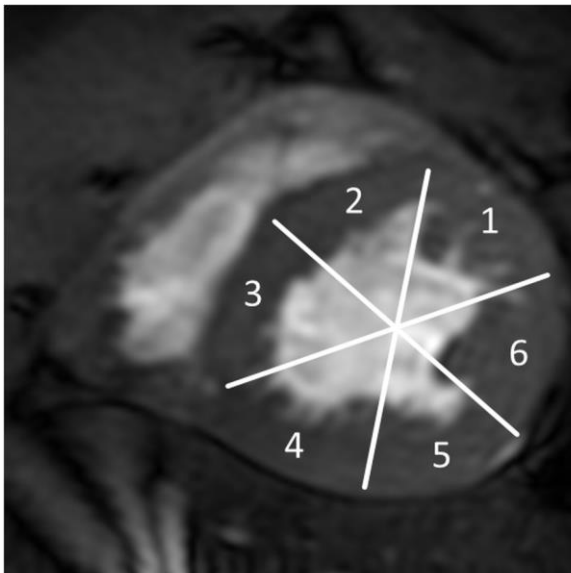

- |                  |                  |
|------------------|------------------|
| 1: Anterior      | 2: Anteroseptal  |
| 3: Inferoseptal  | 4: Inferior      |
| 5: Inferolateral | 6: Anterolateral |

**Supplementary Table: Fractional wall thickening of the left ventricle itemized by segments**

| FracWallTh    | Age groups      |                  |                   | Female      | Male (all)  | All         | p-value<br>(one-way ANOVA,<br>age) |
|---------------|-----------------|------------------|-------------------|-------------|-------------|-------------|------------------------------------|
|               | 23-58<br>Months | 63-106<br>Months | 110-168<br>Months |             |             |             |                                    |
| Anteroseptal  | 41.0 ± 14.3     | 40.6 ± 15.6      | 36.2 ± 21.1       | 40.9 ± 19.6 | 37.7 ± 15.0 | 39.2 ± 17.4 | 0.82                               |
| Inferoseptal  | 57.4 ± 32.0     | 56.8 ± 25.5      | 60.3 ± 17.4       | 58.5 ± 30.4 | 57.9 ± 20.3 | 58.2 ± 25.7 | 0.96                               |
| Inferior      | 55.1 ± 27.4     | 52.3 ± 25.4      | 62.4 ± 18.1       | 58.3 ± 23.9 | 55.3 ± 24.5 | 56.7 ± 24.3 | 0.67                               |
| Inferolateral | 73.9 ± 35.6     | 55.3 ± 30.3      | 59.9 ± 16.4       | 62.5 ± 28.0 | 64.0 ± 31.0 | 63.3 ± 29.6 | 0.38                               |
| Anterolateral | 76.0 ± 29.0     | 55.4 ± 33.1      | 57.9 ± 26.3       | 60.0 ± 29.0 | 66.5 ± 32.2 | 63.4 ± 30.9 | 0.29                               |
| Anterior      | 52.8 ± 16.3     | 46.6 ± 24.3      | 41.3 ± 18.1       | 46.5 ± 23.5 | 47.3 ± 16.7 | 46.9 ± 20.3 | 0.47                               |

All data given as arithmetic mean and standard deviation. Significance level  $p < 0.05$ .
